# Supplementary material for: Clinical use of an opto-nuclear probe for hybrid sentinel node biopsy guidance: first results
Source: Springer Nature journal article supplement (doi:10.1007/s11548-018-1816-5), 2018-07-02
Supplement: MOESM1 [file 15902274]

**Supporting information**

**Table SI1**

| CASE | GENDER | AGE | BMI (kg/m2) | TUMOR | LOCATION | TRACER VOLUME (ml) |
| --- | --- | --- | --- | --- | --- | --- |
| 1 | Female | 66 | 21.0 | Breast | Left retroareolar | 0.5 |
| 2 | Female | 75 | 33.3 | Breast | Right upper inner | 0.5 |
| 3 | Female | 53 | 22.2 | Breast | Left lower central | 0.5 |
| 4 | Female | 75 | 28.7 | Breast | Left lower inner | 0.5 |
| 5 | Female | 57 | 20.9 | Breast | Left upper outer | 0.5 |
| 6 | Female | 42 | 21.0 | Breast | Right central outer | 0.5 |
| 7 | Female | 46 | 23.1 | Breast | Right upper outer | 0.3 |
| 8 | Female | 43 | 22.0 | Breast | Left upper central | 0.5 |
| 9 | Female | 58 | 23.6 | Breast | Right upper inner | 0.3 |
| 10 | Female | 49 | 23.3 | Breast | Right upper outer | 0.5 |
| 11 | Female | 50 | 20.1 | Breast | Right lower inner | 0.5 |
| 12 | Female | 55 | 29.1 | Breast | Right lower inner | 0.3 |
| 13 | Female | 76 | 34.2 | Breast | Right upper outer | 0.5 |
| 14 | Female | 47 | 26.2 | Breast | Left upper outer | 0.5 |
| 15 | Female | 44 | 22.2 | Breast | Right upper inner | 0.5 |
| 16 | Female | 47 | 23.0 | Cervix | Endocervical | 2.0 |
| 17 | Female | 47 | 20.8 | Cervix | Cervical | 2.0 |
| 18 | Female | 30 | 19.7 | Cervix | Cervical | 2.0 |
| 19 | Female | 52 | 25.3 | Cervix | Cervical | 2.0 |
| 20 | Female | 48 | 22.3 | Cervix | Cervical | 2.0 |
| 21 | Female | 47 | 35.4 | Cervix | Cervical | 2.0 |
| 22 | Female | 44 | 24.0 | Cervix | Cervical | 2.0 |
| 23 | Female | 39 | 20.4 | Cervix | Cervical | 2.0 |
| 24 | Female | 76 | 27.3 | Cervix | Cervical | 2.0 |
| 25 | Male | 67 | 29.9 | Melanoma | Right scapula | 0.4 |
| 26 | Male | 74 | 27.9 | Melanoma | Left flank | 0.4 |
| 27 | Female | 37 | 19.7 | Melanoma | Right scapula | 0.4 |
| 28 | Male | 56 | 31.1 | Melanoma | Central sacrum | 0.4 |
| 29 | Female | 47 | 21.5 | Melanoma | Left scalp | 0.4 |
| 30 | Female | 50 | 28.3 | Melanoma | Left ear | 0.4 |
| 31 | Female | 50 | 23.2 | Melanoma | Central back | 0.4 |
| 32 | Female | 30 | 20.1 | Oral cavity | Left tongue | 0.4 |
| 33 | Male | 65 | 28.1 | Oral cavity | Left tongue | 0.4 |

Table SI2.

| **Case** | **SNs**  **planar image** | **SNs SPECT/CT** | **Fluorescence in vivo** | **Radiactivity in vivo** | **Excised nodes** | **Fluorescence ex vivo** | **Radiactivity ex vivo** | **Pathology results** |
| --- | --- | --- | --- | --- | --- | --- | --- | --- |
| 1 | 4 | n/p | 3 | 3 | 3 | 3 | 3 | Negative |
| 2 | 1 | n/p | 2 | 1 | 2 | 2 | 2 | Negative |
| 3 | 1 | n/p | 1 | 1 | 1 | 1 | 1 | Negative |
| 4 | 3 | n/p | 2 | 2 | 3 | 3 | 2 | Negative |
| 5 | 4 | n/p | 2 | 4 | 4 | 4 | 4 | Negative |
| 6 | 1 | n/p | 2 | 2 | 2 | 2 | 2 | Positive (1) |
| 7 | 3 | n/p | 2 | 2 | 3 | 2 | 2 | Negative |
| 8 | 3 | n/p | 2 | 2 | 2 | 2 | 2 | Positive (2) |
| 9 | 2 | n/p | 2 | 2 | 2 | 2 | 2 | Negative |
| 10 | 3 | n/p | 2 | 3 | 3 | 3 | 3 | Negative |
| 11 | 2 | n/p | 1 | 2 | 2 | 1 | 2 | Negative |
| 12 | 1 | n/p | 1 | 1 | 1 | 1 | 1 | Negative |
| 13 | 2 | n/p | 2 | 2 | 2 | 2 | 2 | Negative |
| 14 | 1 | n/p | 1 | 1 | 1 | 1 | 1 | Negative |
| 15 | 2 | n/p | 2 | 2 | 2 | 2 | 2 | Positive (2) |
| 16 | 5 | 5 | 4 | 4 | 4 | 4 | 4 | Negative |
| 17 | 4 | 5 | 3 | 5 | 5 | 5 | 5 | Negative |
| 18 | 5 | 5 | 5 | 5 | 5 | 5 | 5 | Negative |
| 19 | 2 | 3 | 2 | 3 | 3 | 3 | 3 | Negative |
| 20 | 4 | 5 | 3 | 4 | 6 | 3 | 4 | Positive (1) |
| 21 | 5 | 5 | 3 | 3 | 4 | 4 | 3 | Negative |
| 22 | 2 | 4 | 2 | 4 | 4 | 4 | 4 | Negative |
| 23 | 4 | 4 | 2 | 5 | 5 | 4 | 5 | Negative |
| 24 | 5 | 6 | 2 | 5 | 6 | 6 | 6 | Negative |
| 25 | 2 | 3 | 1 | 2 | 2 | 2 | 2 | Negative |
| 26 | 3 | 3 | 4 | 5 | 5 | 4 | 5 | Positive (1) |
| 27 | 3 | 3 | 3 | 4 | 4 | 4 | 4 | Negative |
| 28 | 4 | 4 | 3 | 3 | 3 | 3 | 3 | Negative |
| 29 | 5 | 4 | 3 | 4 | 4 | 4 | 4 | Positive (1) |
| 30 | 3 | 6 | 6 | 7 | 7 | 7 | 7 | Negative |
| 31 | 3 | 3 | 3 | 3 | 3 | 3 | 3 | Positive (1) |
| 32 | 1 | 1 | 1 | 1 | 1 | 1 | 1 | Positive |
| 33 | 2 | 3 | 2 | 2 | 2 | 2 | 2 | Negative |

n/p: not performed

Table SI3

| Case | In vivo fluorescence (cps) | In vivo radiotracer (cps) | Ex vivo fluorescence (cps) | Ex vivo radiotracer (cps) |
| --- | --- | --- | --- | --- |
| 1 | 3 (8000/15000/12000) | 3 (150/300/45) | 3 (15000 x 3) | 3 (163/340/62) |
| 2 | 2 (12000/10000) | 1 (180) | 2 (15000 x 2) | 2 (270/27) |
| 3 | 1 (7000) | 1 (580) | 1 (15000) | 1 (1352) |
| 4 | 2 (11500/13000) | 2 (200/280) | 3 (15000 x 2 /450) | 2 (253/353) |
| 5 | 2 (10500/10000) | 4 (120/100/28/25) | 4 (15000/15000/10000/7000) | 4 (147/104/34/20) |
| 6 | 2 (12500/7000) | 2 (370/38) | 2 (15000 x 2) | 2 (404/36) |
| 7 | 2 (15000/13000) | 2 (220/58) | 2 (15000 x 2) | 2 (230/76) |
| 8 | 2 (8000/4000) | 2 (110/50) | 2 (9000/5000) | 2 (120/61) |
| 9 | 2 (7700/10950) | 2 (120/190) | 2 (10000/15000) | 2 (120/194) |
| 10 | 2 (12500/8000) | 3 (150/100/39) | 3 (15000/11020/1200) | 3 (170/120/70) |
| 11 | 1 (10300) | 2 (540/5) | 1 (15000) | 2 (640/4) |
| 12 | 1 (440) | 1 (80) | 1 (7800) | 1 (80) |
| 13 | 2 (12500/2000) | 2 (1100/180) | 2 (15000/2500) | 2 (1500/242) |
| 14 | 1 (10500) | 1 (195) | 1 (15000) | 1 (250) |
| 15 | 2 (5000/1000) | 2 (40/5) | 2 (7600/1200) | 2 (51/38) |
| 16 | 4(12000/15000/3000/15000) | 4 (170/180/38/197) | 4 (15000 x 3/5200 | 4 (211/247/51/248) |
| 17 | 3 (13000/8000/10000) | 5 (440/320/100/75/70) | 5(15000/11000/5700/12000/2500) | 5 (678/358/140/93/72) |
| 18 | 5 (15000 X 5) | 5 (740/100/10/300/15) | 5 (15000 x 5) | 5 (780/146/20/351/25) |
| 19 | 2 (15000/15000) | 3 (118/50/360) | 3 (15000 x 3) | 3 (444/120/370) |
| 20 | 3 (3600/3700/3500) | 4 (71/130/45/38) | 3 (15000 x 2 /4800) | 4 (84/260/68/34) |
| 21 | 3 (12000/10000/15000) | 3 (45/29/40) | 4 (15000 x 3/10000) | 3 (54/43/70) |
| 22 | 2 (2500/10000) | 4 (161/283/24/26) | 4 (10000/15000/300/3200) | 4 (208/369/11/28) |
| 23 | 2 (11000/15000) | 5 (200/25/17/4/1200) | 4 (15000/6800/2500/1740/15000) | 5 (288/29/12/8/1470) |
| 24 | 2 (4500/5000) | 5 (33/41/40/110/32) | 6 (15000 x 4/3000/1000) | 6 (4/74/65/67/313/30) |
| 25 | 1 (12000) | 2 (1750/250) | 2 (15000/6300) | 2 (3360/308) |
| 26 | 4 (15000/6000/5200/4300) | 5(780/180/100/480/630) | 4 (15000 x 2/8400/7000) | 5 (965/530/120/200/750) |
| 27 | 3 (8000/7300/1200) | 4 (1900/980/200/320) | 4 (12500/8000/2050/1000) | 4 (2100/1070/270/410) |
| 28 | 3 (12500/13000/10000) | 3 (1500/390/339) | 3 (15000 x 3) | 3 (1909/396/350) |
| 29 | 3 (13500/7300/5200) | 4 (1600/1340/190/300) | 4 (15000x2/10000/2300) | 4 (2013/1500/207/340) |
| 30 | 6 (12000/8000/7000/3500/3200/1500) | 7 (100/276/340/500/100/536/ 170) | 7 (15000 x 5/2500/900) | 7 (100/276/340/500/100  /536/570) |
| 31 | 3 (12000/15000/10000) | 3 (120/7560/240) | 3 (15000 x 3) | 3 (138/80/238) |
| 32 | 1 (15000) | 1 (780) | 1 (15000) | 1 (930) |
| 33 | 2 (13000/2500) | 2 (2000/490) | 2 (15000/4000) | 2 (2100/530) |
